# Supplementary material for: A water-soluble pyridyl-triazole ligand for aqueous phase palladium catalyzed Suzuki–Miyaura coupling
Source: Royal Society of Chemistry journal article supplement (doi:10.1039/c3ra44740e), 2013-01-01
Supplement: c3ra44740e.pdf [file c3ra44740e.pdf]

# **A water-soluble pyridyl-triazole ligand for aqueous phase palladium catalyzed Suzuki-Miyaura coupling**

Emanuele Amadio, Alberto Scrivanti,\* Valentina Beghetto, Matteo Bertoldini, Md. Mahbul Alam and Ugo Matteoli

Department of Molecular Science and Nanosystems, Università Cà Foscari Venezia, Venice (Italy)

Fax: +39 041 2348917; Tel: +39 041 2348903; E-mail: [scrivanti@unive.it](mailto:scrivanti@unive.it)

## **ELECTRONIC SUPPLEMENTARY INFORMATION**

|                                                                         |        |
|-------------------------------------------------------------------------|--------|
| Experimental details for ligand <b>1</b> synthesis and characterization | p. 2   |
| Characterization of coupling products                                   | p. 3-5 |
| References                                                              | p. 5   |

## EXPERIMENTAL

### *Materials and Instrumentation*

Phenylboronic acid, p-bromoacetophenone, 1-bromo-4-methoxybenzene, 1-bromo-4-methylbenzene, 1-bromo-2-methylbenzene, 2-bromo-1,3,5-trimethylbenzene, 4-bromobenzaldehyde, 2-bromothiophene, 3-bromothiophene, bromonaphthalene, bromopyridine, bromopyrimidine, 4-chloroacetophenone, quaternary ammonium salts, analytical grade  $K_2CO_3$ ,  $Na_2CO_3$  and  $Cs_2CO_3$  were purchased from Aldrich and used as received.

“Milli Q” purified water was employed in the catalytic experiments. Tetrahydrofuran, methanol, diethyl ether, and other commercial solvents (Aldrich) were purified as described in the literature.<sup>1</sup> But-3-ynyl sodium sulfate was prepared by a literature procedure;<sup>2</sup>  $[Pd(\eta^3-C_3H_5)Cl]_2$  was prepared as described by Hartley.<sup>3</sup>

$^1H$  and  $^{13}C\{^1H\}$  NMR spectra were recorded on a Bruker AVANCE 300 spectrometer. The chemical shift values of the spectra are reported in  $\delta$  units with reference to the residual solvent signal. GC analyses were performed on an Agilent Technologies 6850 gas chromatograph fitted with an HP-5 column (30 m  $\times$  0.32  $\mu$ m  $\times$  0.25  $\mu$ m). GC-MS spectra were recorded on a Hewlett–Packard 5890 series II gas chromatograph interfaced to a HP 5971 quadrupole mass detector.

ESI-MS analyses were performed using an Agilent LC-MSD-Trap-SL operating in negative ion mode. Freshly prepared methanol solutions of **1** in were introduced into the ESI source by a syringe pump at 8  $\mu$ L/min flow rate.

### *2.2. Sodium 2-(1-((pyridin-2-yl)methyl)-1H-1,2,3-triazol-4-yl)ethyl sulfate (1)*

To a suspension of but-3-ynyl sodium sulfate (455 mg, 2.6 mmol) in a mixture of *t*-BuOH (15 mL) and  $H_2O$  (1 mL) were added a solution of 2-(azidomethyl)pyridine (3.57 mg, 2.7 mmol) in *t*-BuOH (5 mL), and, finally, a solution of  $Cu(OAc)_2 \cdot H_2O$  (26 mg, 0.13 mmol) in water (0.5 mL).

The mixture was stirred under inert atmosphere for 48 hours, then the liquid phase was taken to dryness to give a green solid. Flash-chromatography (silica gel, tetrahydrofuran/methanol 6:4) affords the title compound as a white solid which was dissolved in methanol and precipitated with diethylether (525 mg, 66%).

$^1H$  NMR (300 MHz, 298 K,  $CD_3OD$ ):  $\delta$  8.54 (d, 1H,  $J = 3.8$  Hz), 7.96 (s, 1H), 7.84 (tt, 1H;  $J = 7.7$  and 1.9 Hz), 7.38 (m, 1H), 7.28 (d, 1H,  $J = 7.9$  Hz), 5.70 (s, 1H), 4.25 (t, 1H;  $J = 6.5$  Hz), 3.09 (t, 1H;  $J = 6.5$  Hz).  $^{13}C\{^1H\}$  NMR (75 MHz, 298 K,  $CD_3OD$ ):  $\delta = 155.8, 150.4, 145.8, 139.1, 124.9, 124.7, 123.8, 67.6, 55.9, 26.8$ . ESI-MS in negative mode: 283.0 ( $C_{10}H_{11}N_4O_4S^-$ , 100%), 589 ( $1 + C_{10}H_{11}N_4O_4S^-$ , 4%). Anal. Found: C, 39.3; H, 3.5.  $C_{10}H_{11}N_4O_4SNa$  requires: C, 39.22; H, 3.62.

## NMR characterization of the coupling products

### 4-Acetylbiphenyl<sup>4</sup>

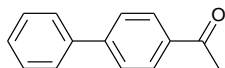

<sup>1</sup>H NMR (300 MHz, CDCl<sub>3</sub>) δ: 8.02 (m, 2H), 7.67 (m, 2H), 7.64 (m, 2H), 7.53-7.30 (m, 3H), 2.64 (s, 3H). <sup>13</sup>C NMR (75 MHz, CDCl<sub>3</sub>) δ: 197.7, 145.9, 139.9, 136.80, 129.07, 129.05, 128.3, 127.38, 127.33, 26.8.

### biphenyl<sup>5</sup>

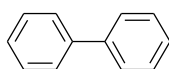

<sup>1</sup>H NMR (300 MHz, CDCl<sub>3</sub>) δ: 7.47 (t, *J* = 7.0 Hz, 2H), 7.56 (t, *J* = 7.4 Hz, 4H), 7.71 (d, *J* = 7.6 Hz, 4H). <sup>13</sup>C NMR (75 MHz, CDCl<sub>3</sub>) δ: 127.2, 127.3, 128.8, 141.3.

### 4-methylbiphenyl<sup>4</sup>

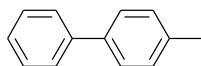

<sup>1</sup>H NMR (300 MHz, CDCl<sub>3</sub>) δ: 7.59 (m, 2H), 7.49 (m, 2H), 7.44-7.40 (m, 2H), 7.32 (m, 1H), 7.24-7.20 (m, 2H), 2.40 (s, 3H). <sup>13</sup>C NMR (75 MHz, CDCl<sub>3</sub>) δ: 144.2, 138.3, 136.9, 129.4, 128.7, 126.9, 126.7, 21.1.

### 2-methylbiphenyl<sup>4</sup>

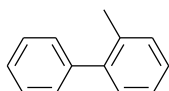

<sup>1</sup>H NMR (300 MHz, CDCl<sub>3</sub>) δ: 7.44-7.35 (m, 2H), 7.34-7.27 (m, 3H), 7.26-7.18 (m, 4H), 2.26 (s, 3H). <sup>13</sup>C NMR (75 MHz, CDCl<sub>3</sub>) δ: 142.0, 141.90, 135.4, 130.4, 129.9, 129.3, 128.2, 127.4, 127.0, 125.9, 20.6.

### 4-biphenylcarbaldehyde<sup>6</sup>

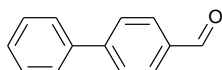

<sup>1</sup>H NMR (300 MHz, CDCl<sub>3</sub>) δ: 10.06 (s, 1H, CHO), 7.95 (m, 2H), 7.75 (m, 2H), 7.62 (m, 2H), 7.50-7.40 (m, 3H). <sup>13</sup>C NMR (75 MHz, CDCl<sub>3</sub>) δ: 191.9, 147.1, 139.7, 135.2, 130.2, 129.0, 128.4, 127.6, 127.3.

#### 4-Methoxybiphenyl<sup>4</sup>

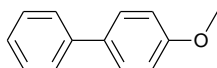

<sup>1</sup>H NMR (300 MHz, CDCl<sub>3</sub>) δ: 7.44-7.40 (m, 4H) 7.32-7.28(m, 2H), 6.98 (m, 2H), 3.86 (s, 3H).

<sup>13</sup>C NMR (75 MHz, CDCl<sub>3</sub>) δ: 159.1, 140.8, 133.7, 128.7, 128.1, 126.7, 126.6, 114.1, 55.3.

#### 1-Phenyl-naphthalene<sup>7</sup>

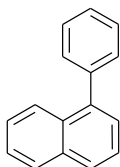

<sup>1</sup>H NMR (300MHz, CDCl<sub>3</sub>) δ: 7.96 (m, 2H), 7.91 (m, 1H), 7.59-7.44 (m, 9H). <sup>13</sup>C NMR (75 MHz, CDCl<sub>3</sub>) δ: 140.9, 140.4, 133.9, 131.7, 130.2, 128.4, 127.7, 127.3, 127.0, 126.13, 125.9, 125.5.

#### 4-Fluorobiphenyl<sup>7</sup>

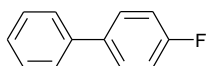

<sup>1</sup>H NMR (300MHz, CDCl<sub>3</sub>) δ: 7.54 (m, 4H), 7.44 (t, *J* = 7.8 Hz, 2H), 7.35 (d, *J* = 7.8 Hz, 1H), 7.12 (t, *J* = 8.7 Hz, 2H). <sup>13</sup>C NMR (75 MHz, CDCl<sub>3</sub>) δ: 162.7 (d, *J* = 245.2 Hz), 140.4, 137.5, 129.02, 128.89, 128.79, 127.5, 127.2, ; 115.8 (d, *J* = 21.3 Hz).

#### 2,4,6-trimethylbiphenyl<sup>8</sup>

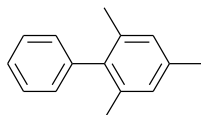

<sup>1</sup>H NMR (300 MHz, CDCl<sub>3</sub>) δ: 7.48-7.45 (m, 1H), 7.24-7.19 (m, 2H), 7.10-7.05 (m, 2H), 6.96 (s, 2H), 2.30 (s, 3H, CH<sub>3</sub>), 2.03 (s, 6H).

#### 3-Phenylpyridine<sup>9</sup>

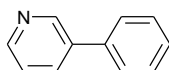

<sup>1</sup>H NMR (300 MHz, CDCl<sub>3</sub>) δ: 8.85 (s, 1H), 8.54 (d, *J* = 4 Hz, 1H), 7.88 (d, *J* = 7.8 Hz, 1H), 7.52-7.48 (m, 2H), 7.40-7.25 (m, 4H). <sup>13</sup>C NMR (75 MHz, CDCl<sub>3</sub>) δ: 148.1, 148.0, 137.6, 136.5, 134.3, 129.0, 128.1, 127.0, 123.5.

### 5-Phenylpyrimidine<sup>9</sup>

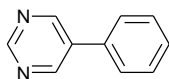

<sup>1</sup>H NMR (300 MHz, CDCl<sub>3</sub>) δ: 9.20 (s, 1H), 8.93 (s, 2H), 7.57-7.44 (m, 5H). <sup>13</sup>C NMR (75 MHz, CDCl<sub>3</sub>) δ: 157.3, 154.7, 134.1, 134.0, 129.3, 128.9, 126.8.

### 2-Phenylthiophene<sup>9</sup>

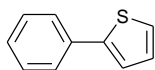

<sup>1</sup>H NMR (300 MHz, CDCl<sub>3</sub>) δ: 7.67-7.64 (m, 2H), 7.44-7.41 (m, 2H), 7.36-7.30 (m, 3H), 7.10 (m, 1H) <sup>13</sup>C NMR (75 MHz, CDCl<sub>3</sub>) δ: 144.3, 134.2, 128.9, 128.0, 127.4, 125.9, 124.8, 122.9.

### REFERENCES

1. W. L. F. Armarego, D. D. Perrin, *Purification of Laboratory Chemicals*, IV ed., Butterworth-Heinemann, Oxford, 1996.
2. A. Sousa-Herves, E. Fernandez-Megia, and R. Riguera, *Chem. Commun.*, 2008, 3136–3138.
3. F. R. Hartley and S. R. Jones, *J. Organomet. Chem.*, 1974, **66**, 465–473.
4. R. Huang and K. H. Shaughnessy, *Organometallics*, 2006, **25**, 4105-4112.
5. Q.-X. Liu, W. Zhang, X.-J. Zhao, Z.-X. Zhao, M.-C. Shi and X.-G. Wang, *Eur. J. Org. Chem.*, 2013, 1253–1261.
6. A. K. Sahoo, T. Oda, Y. Nakao and T. Hiyama, *Adv. Synth. Catal.* 2004, **346**, 1715-1727.
7. T. Fujihara, S. Yoshida, J. Terao and Y. Tsuji, *Org. Lett.*, 2009, 11, 2121–2124.
8. L. A. Labios, M. D. Millard, A. L. Rheingold and J. S. Figueroa, *J. Am. Chem. Soc.*, 2009, **131**, 11318–11319.
9. J.-H. Li, Q.-M. Zhu and Y.-X. Xie, *Tetrahedron*, 2006, **62**, 10888–10895.
